# Supplementary material for: Design, synthesis and antitumor study of novel NO-type porphyrin–ferulic acid derivatives for chemotherapy and photodynamic therapy
Source: Royal Society of Chemistry journal article supplement (doi:10.1039/d4nj01134a), 2024-01-01
Supplement: d4nj01134a2.pdf [file d4nj01134a2.pdf]

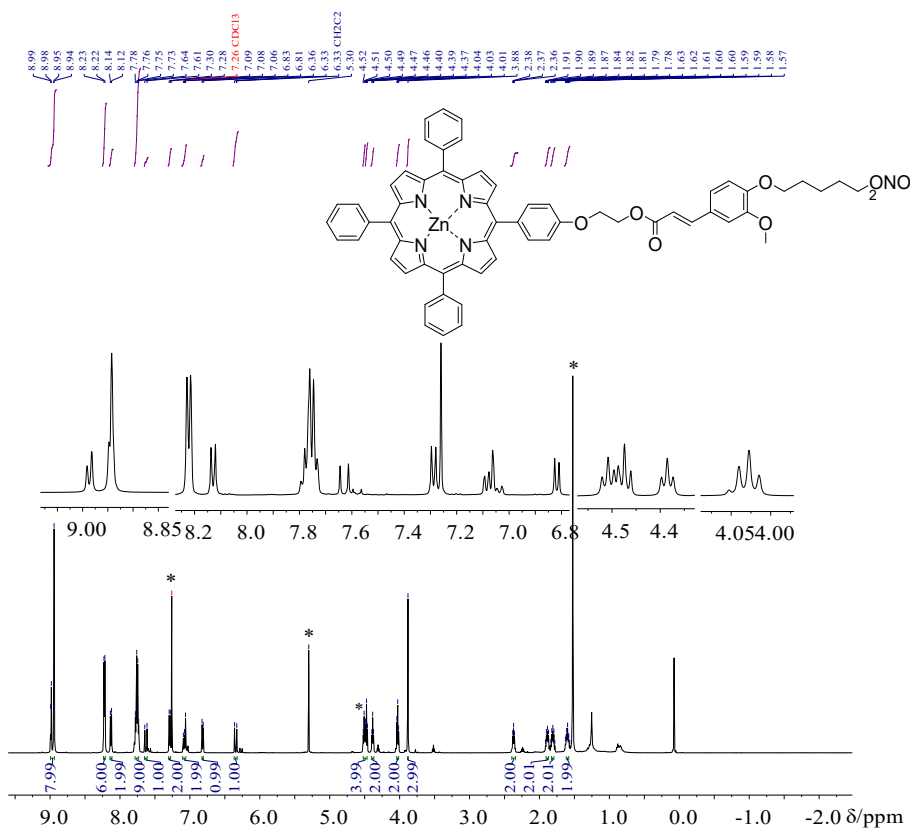

Figure 1.8. <sup>1</sup>H NMR of compound 7a

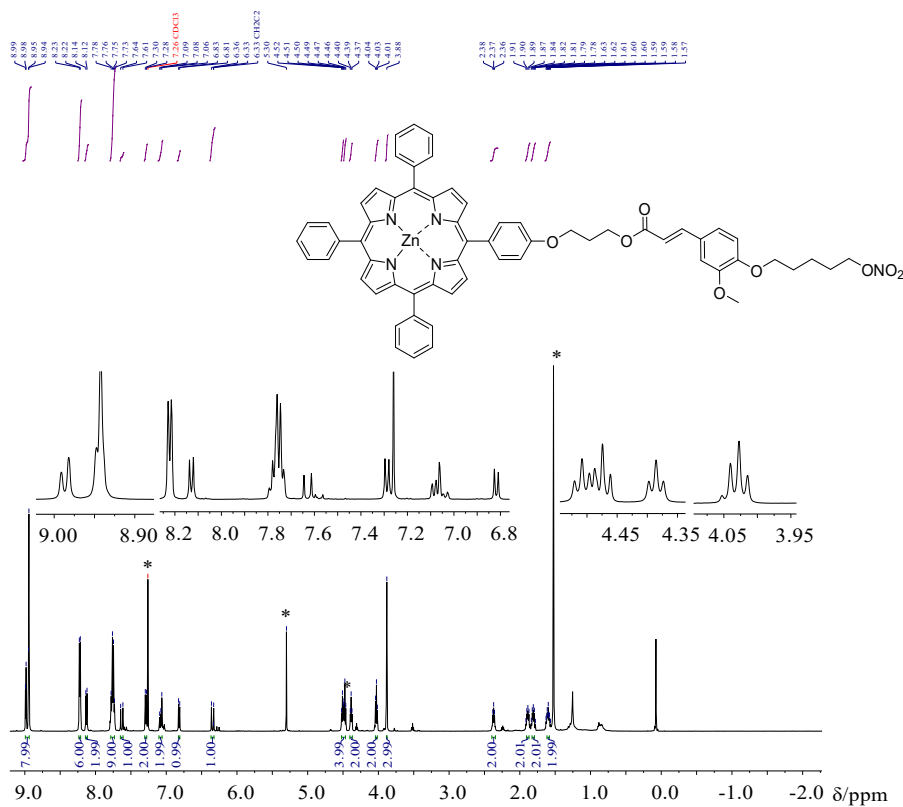

Figure 1.9. <sup>1</sup>H NMR of compound 7b

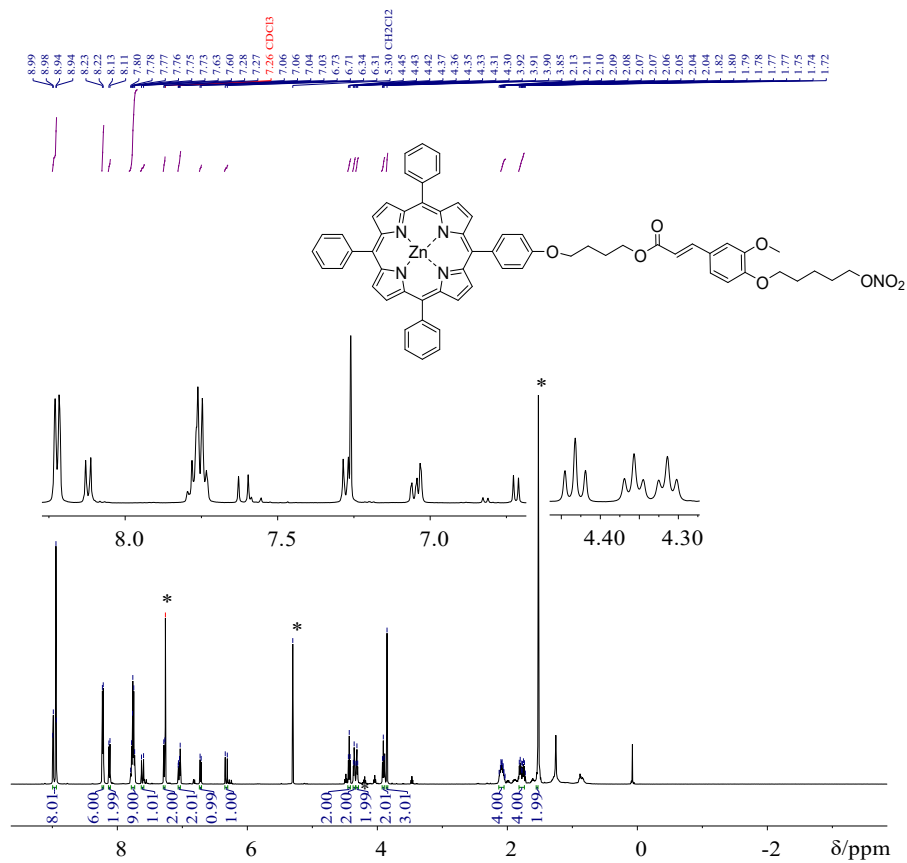

Figure 1.10.  $^1\text{H}$  NMR of compound 7c

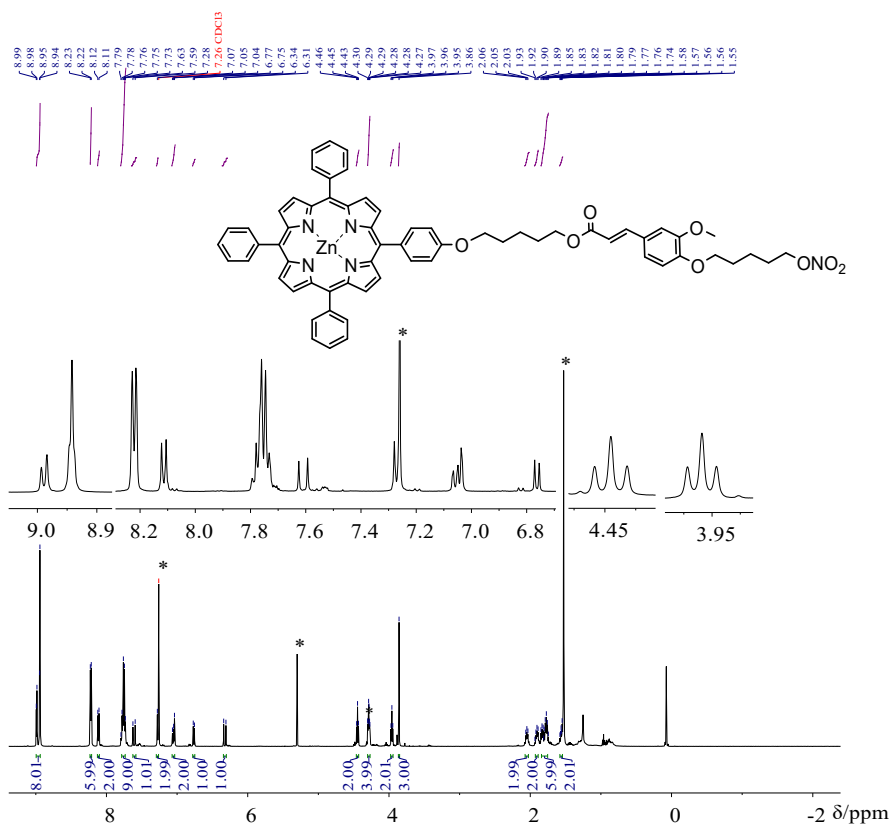

Figure 1.11. <sup>1</sup>H NMR of compound 7d

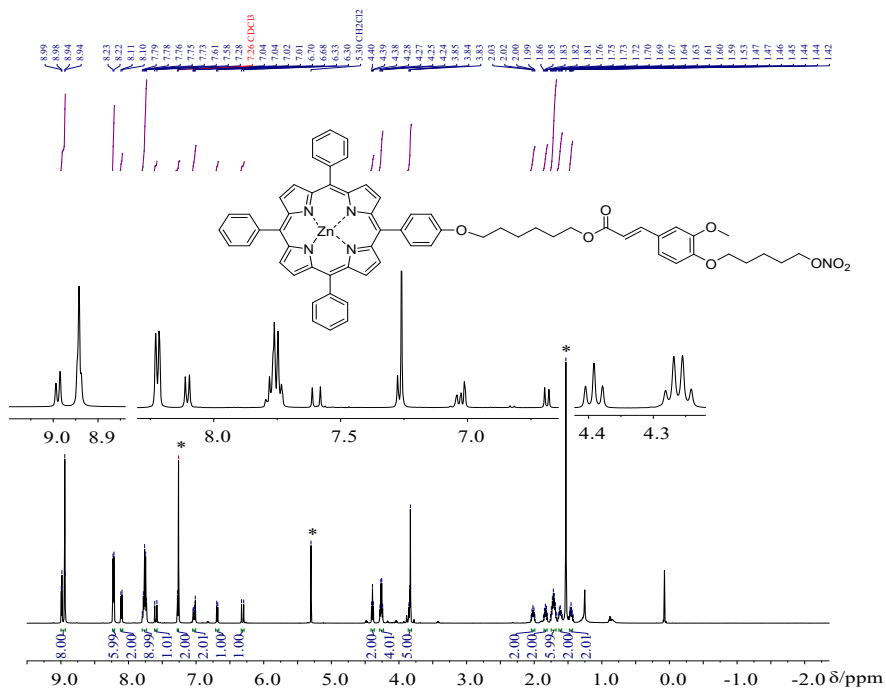

Figure 1.12. <sup>1</sup>H NMR of compound 7e
