# Supplementary material for: Design, synthesis and antitumor study of novel NO-type porphyrin–ferulic acid derivatives for chemotherapy and photodynamic therapy
Source: Royal Society of Chemistry journal article supplement (doi:10.1039/d4nj01134a), 2024-01-01
Supplement: d4nj01134a3.pdf [file d4nj01134a3.pdf]

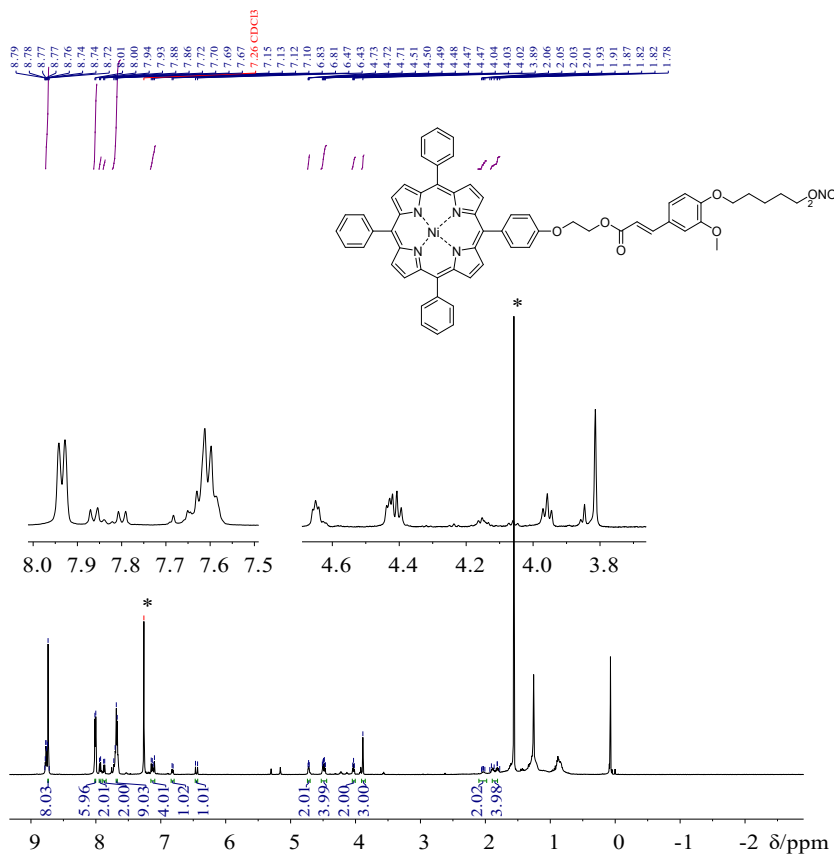

Figure 1.13. <sup>1</sup>H NMR of compound 8a

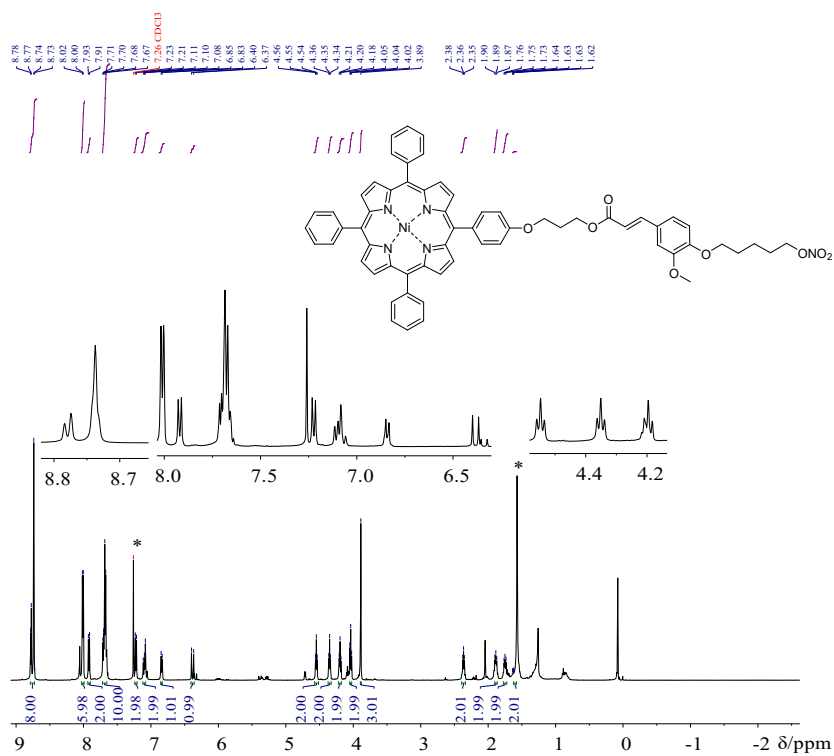

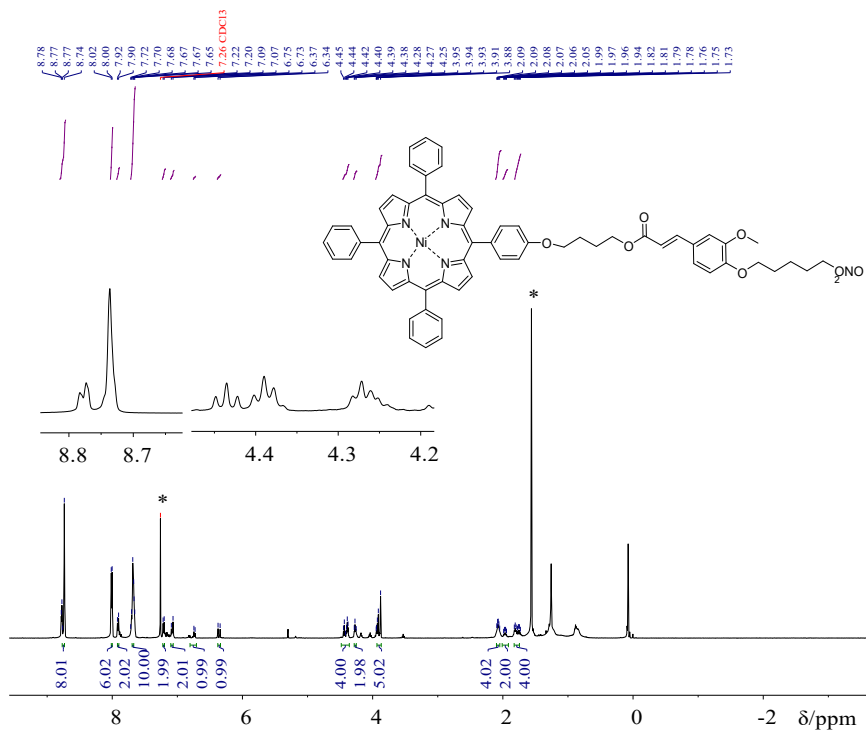

Figure 1.15. <sup>1</sup>H NMR of compound 8c

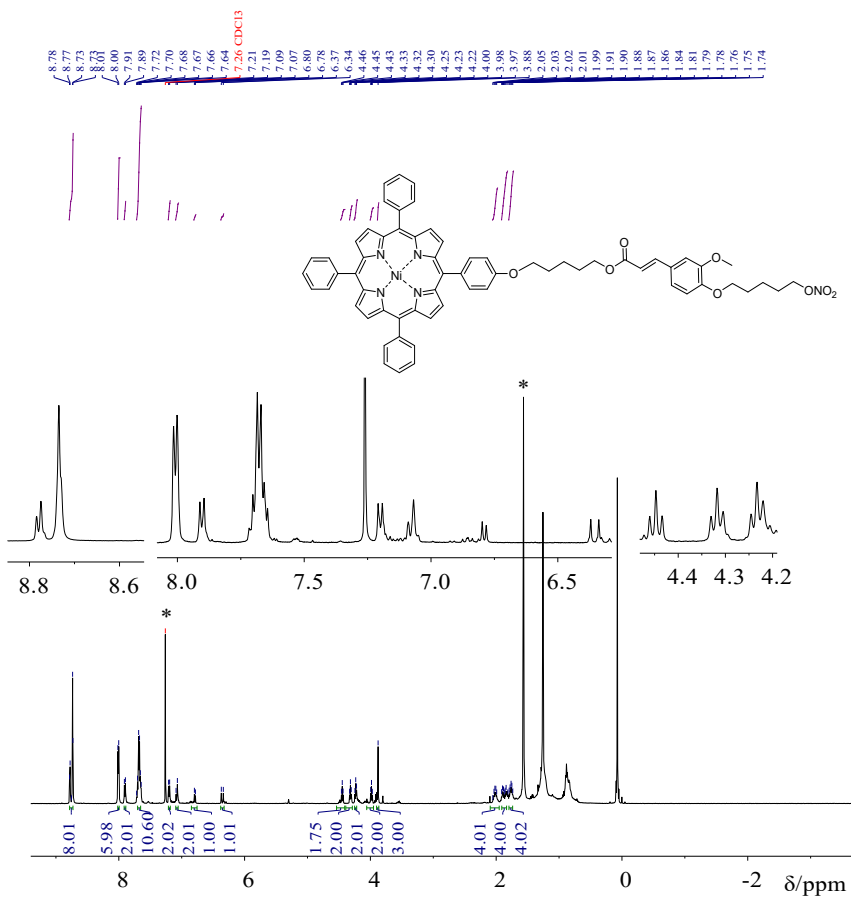

Figure 1.16. <sup>1</sup>H NMR of compound 8d

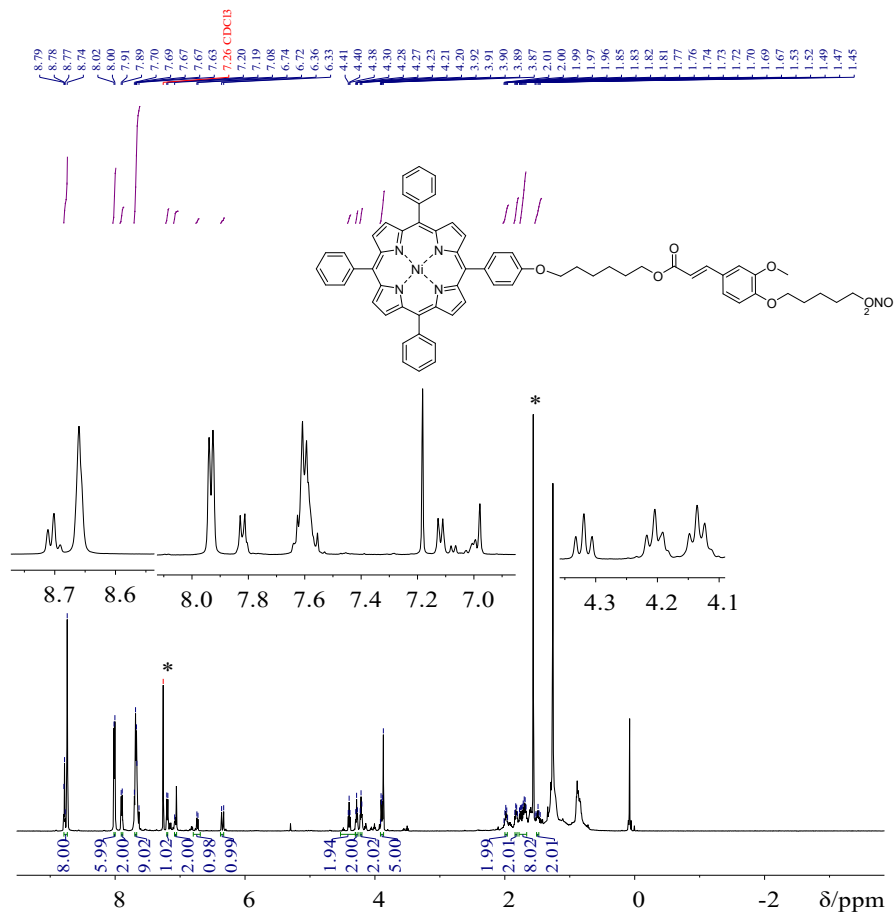

Figure 1.17. <sup>1</sup>H NMR of compound **8e**
