# Supplementary material for: Design, synthesis and antitumor study of novel NO-type porphyrin–ferulic acid derivatives for chemotherapy and photodynamic therapy
Source: Royal Society of Chemistry journal article supplement (doi:10.1039/d4nj01134a), 2024-01-01
Supplement: d4nj01134a4.pdf [file d4nj01134a4.pdf]

#### 4. Infrared spectra of NO-type porphyrin-ferulic acid derivatives

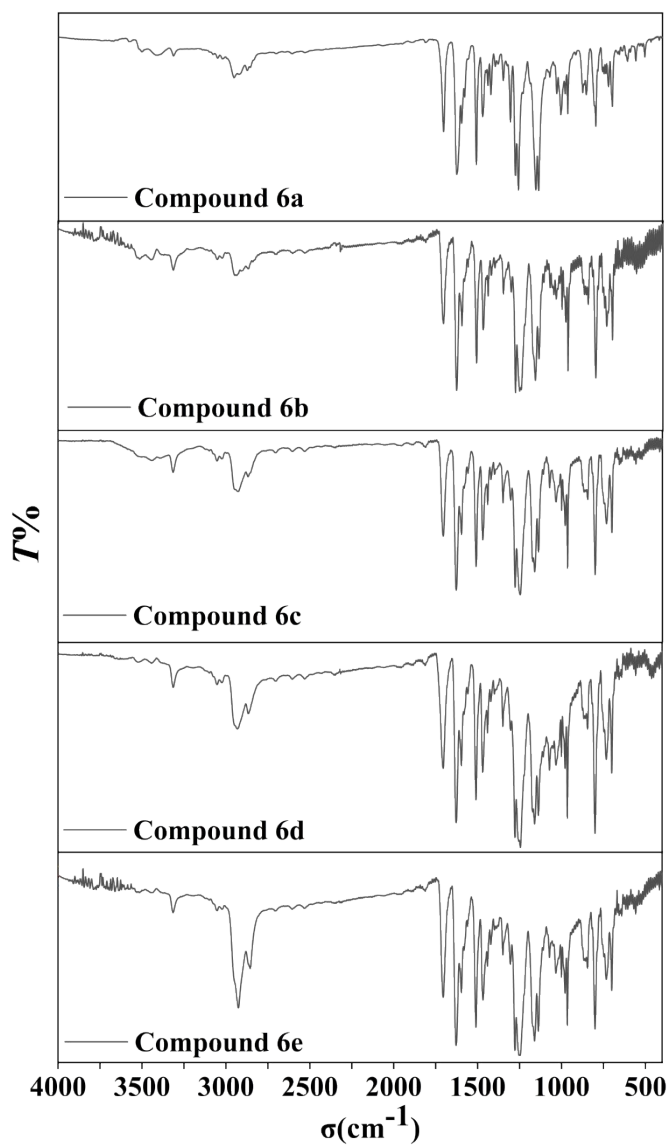

Figure 4.1. Infrared spectra of compounds 6a-6e

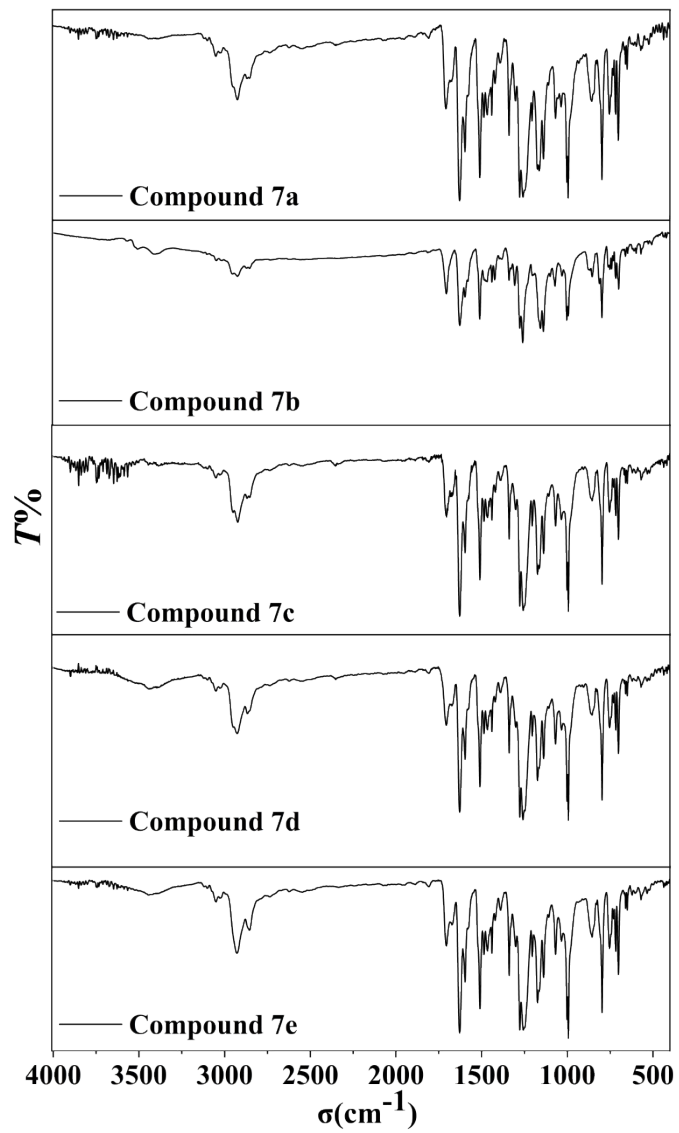

**Figure 4.2.** Infrared spectra of compounds **7a-7e**

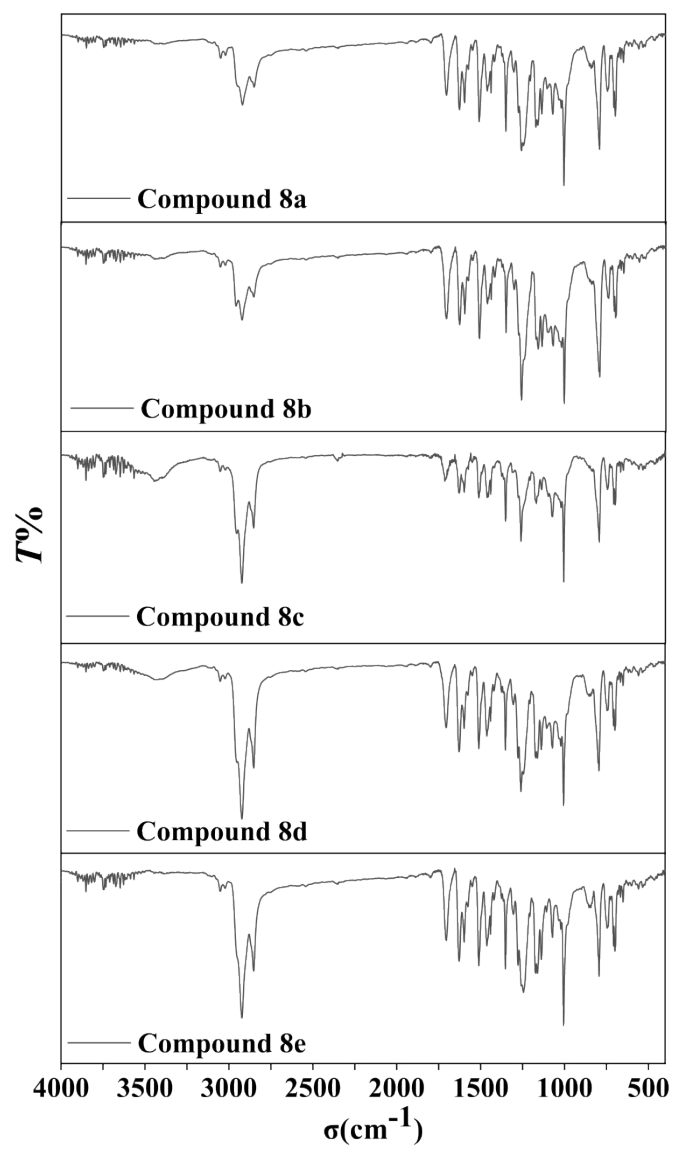

**Figure 4.3.** Infrared spectra of compounds **8a-8e**
