# Supplementary material for: Design, synthesis and antitumor study of novel NO-type porphyrin–ferulic acid derivatives for chemotherapy and photodynamic therapy
Source: Royal Society of Chemistry journal article supplement (doi:10.1039/d4nj01134a), 2024-01-01
Supplement: d4nj01134a5.pdf [file d4nj01134a5.pdf]

### 3.High-performance liquid chromatogram of NO-type porphyrin-ferulic acid derivatives

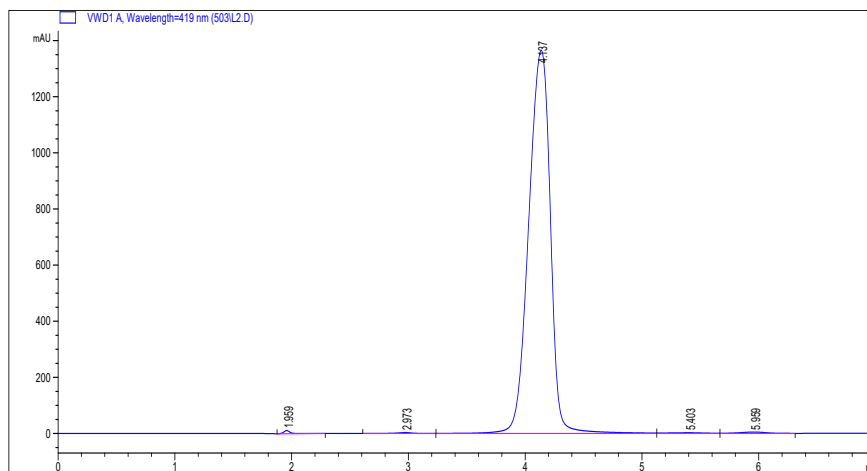

Figure 3.1. High-performance liquid chromatogram of compound 6a

Table 1. High performance liquid chromatography data of compound 6a

| Peak | Retention time (Min) | Peak area (mAU*s) | Peak area (%) |
|------|----------------------|-------------------|---------------|
| 1    | 1.959                | 46.88355          | 0.2640        |
| 2    | 2.973                | 24.94990          | 0.1405        |
| 3    | 4.137                | 175660e4          | 98.9301       |
| 4    | 5.403                | 47.10899          | 0.2653        |
| 5    | 5.959                | 71.03392          | 0.4001        |

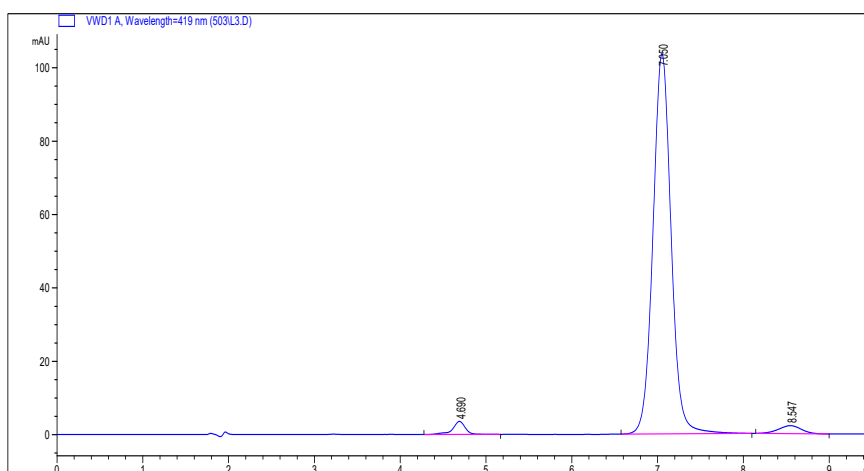

Figure 3.2. High-performance liquid chromatogram of compound 6b

**Table 2.** High performance liquid chromatography data of compound **6b**

| Peak | Retention time (Min) | Peak area (mAU*s) | Peak area (%) |
|------|----------------------|-------------------|---------------|
| 1    | 4.690                | 36.39994          | 2.2787        |
| 2    | 7.050                | 1520.90222        | 95.2091       |
| 3    | 8.547                | 40.13184          | 2.5123        |

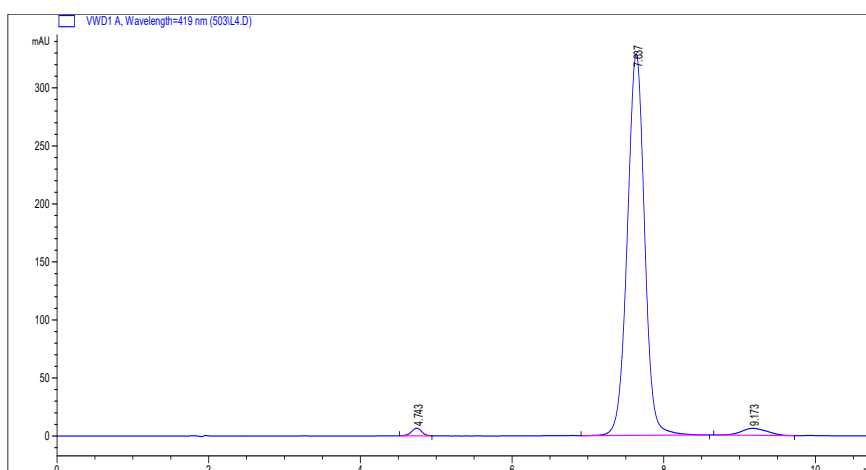

**Figure 3.3.** High-performance liquid chromatogram of compound **6c**

**Table 3.** High performance liquid chromatography data of compound **6c**

| Peak | Retention time (Min) | Peak area (mAU*s) | Peak area (%) |
|------|----------------------|-------------------|---------------|
| 1    | 4.743                | 64.42660          | 1.1943        |
| 2    | 7.637                | 5190.83398        | 96.2208       |
| 3    | 9.173                | 5.88305           | 2.5849        |

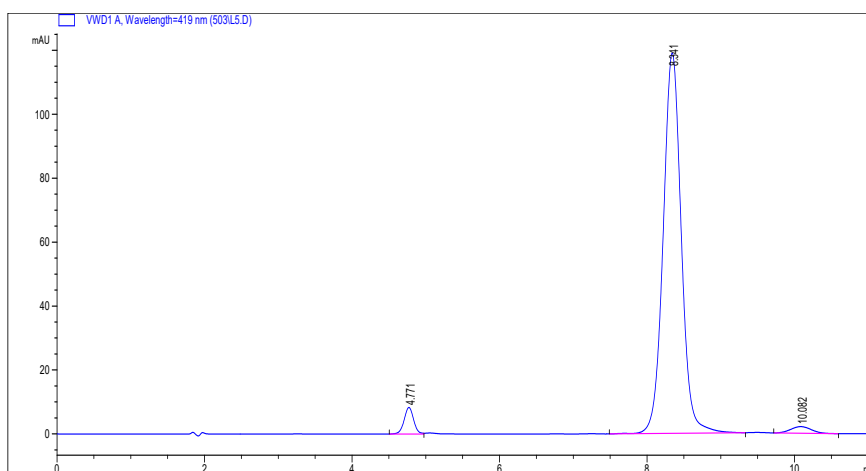

**Figure 3.4.** High-performance liquid chromatogram of compound **6d**

**Table 4.** High performance liquid chromatography data of compound **6d**

| Peak | Retention time (Min) | Peak area (mAU*s) | Peak area (%) |
|------|----------------------|-------------------|---------------|
| 1    | 4.771                | 8.29960           | 3.4767        |
| 2    | 8.341                | 119.01857         | 94.6388       |
| 3    | 10.082               | 2.07505           | 1.8845        |

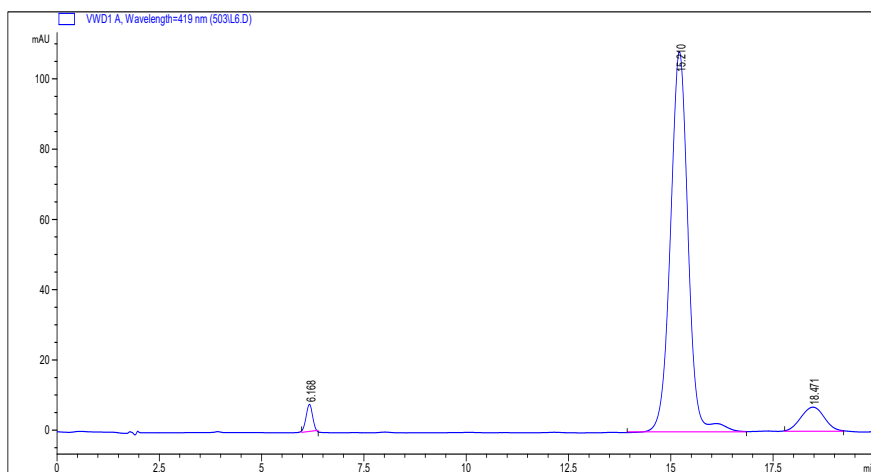

**Figure 3.5.** High-performance liquid chromatogram of compound **6e**

**Table 5.** High performance liquid chromatography data of compound **6e**

| Peak | Retention time (Min) | Peak area (mAU*s) | Peak area (%) |
|------|----------------------|-------------------|---------------|
| 1    | 6.168                | 83.83640          | 2.3280        |
| 2    | 15.210               | 3241.33301        | 90.0061       |
| 3    | 18.471               | 276.06702         | 7.6659        |

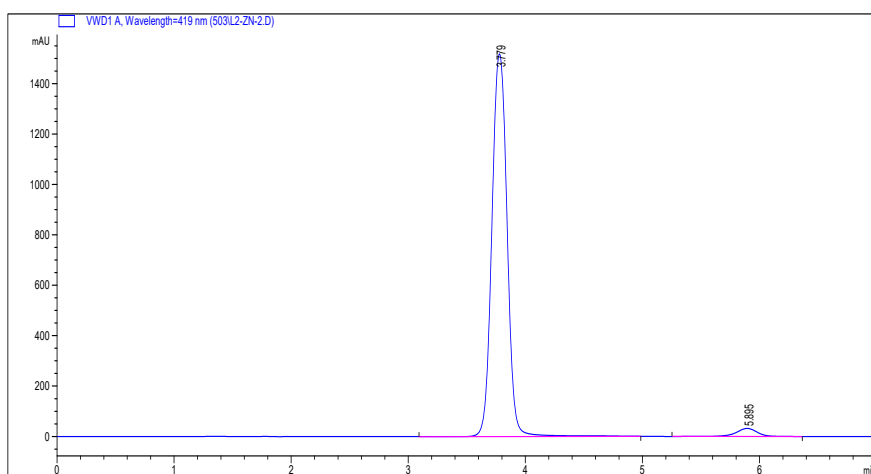

**Figure 3.6.** High-performance liquid chromatogram of compound **7a**

**Table 6.** High performance liquid chromatography data of compound **7a**

| Peak | Retention time (Min) | Peak area (mAU*s) | Peak area (%) |
|------|----------------------|-------------------|---------------|
| 1    | 3.779                | 1.36623e4         | 96.7486       |
| 2    | 4.591                | 60.96805          | 0.4317        |
| 3    | 5.895                | 398.17108         | 2.8196        |

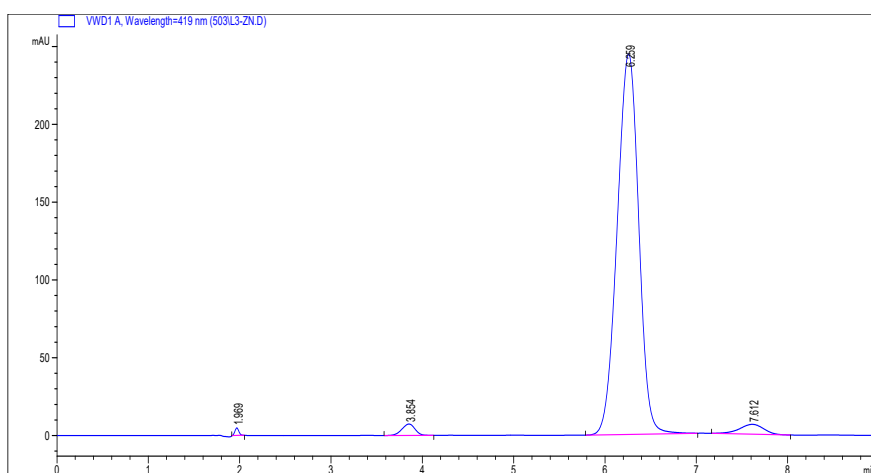

**Figure 3.7.** High-performance liquid chromatogram of compound **7b**

**Table 7.** High performance liquid chromatography data of compound **7b**

| Peak | Retention time (Min) | Peak area (mAU*s) | Peak area (%) |
|------|----------------------|-------------------|---------------|
| 1    | 1.969                | 14.16966          | 0.3373        |
| 2    | 3.854                | 72.54426          | 1.7271        |
| 3    | 6.259                | 3997.24951        | 95.1650       |
| 4    | 7.612                | 116.37311         | 2.7706        |

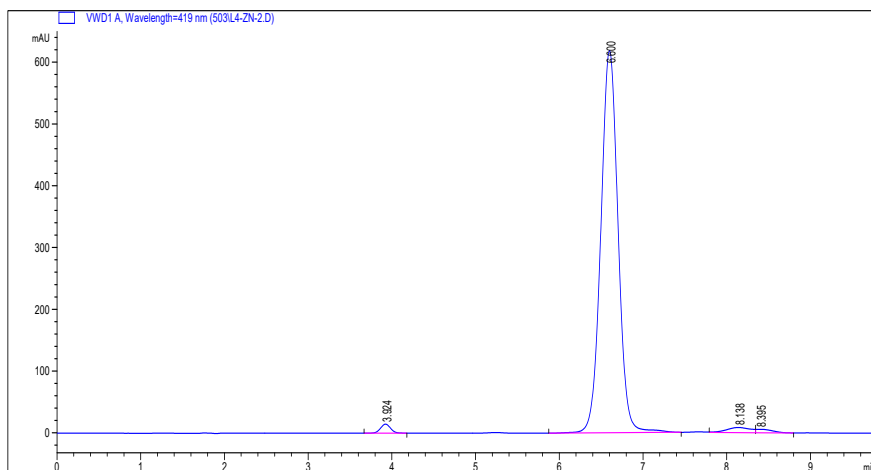

**Figure 3.8.** High-performance liquid chromatogram of compound **7c**

**Table 8.** High performance liquid chromatography data of compound **7c**

| Peak | Retention time (Min) | Peak area (mAU*s) | Peak area (%) |
|------|----------------------|-------------------|---------------|
| 1    | 3.924                | 120.78991         | 1.3138        |
| 2    | 6.600                | 8835.60254        | 96.1042       |
| 3    | 8.138                | 164.59253         | 1.7903        |
| 4    | 8.395                | 72.78889          | 0.7917        |

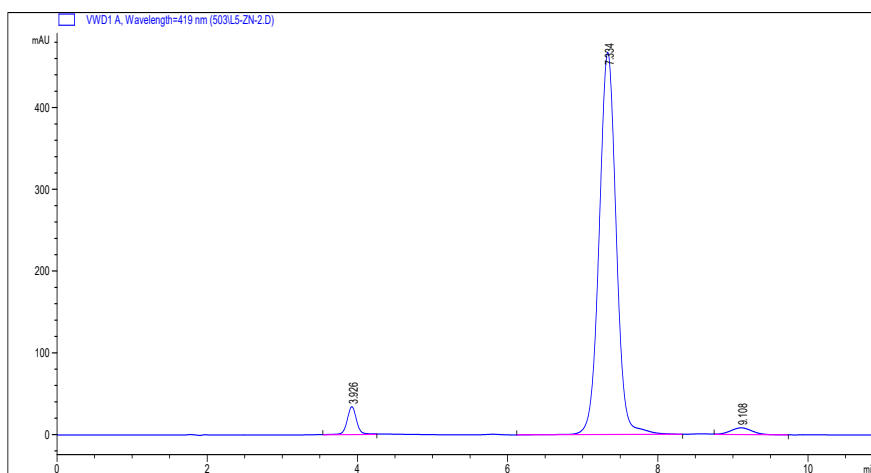

**Figure 3.9.** High-performance liquid chromatogram of compound **7d**

**Table 9.** High performance liquid chromatography data of compound **7d**

| Peak | Retention time (Min) | Peak area (mAU*s) | Peak area (%) |
|------|----------------------|-------------------|---------------|
| 1    | 3.926                | 297.96017         | 3.8150        |
| 2    | 7.334                | 7348.48584        | 94.0876       |
| 3    | 9.108                | 163.88190         | 2.0974        |

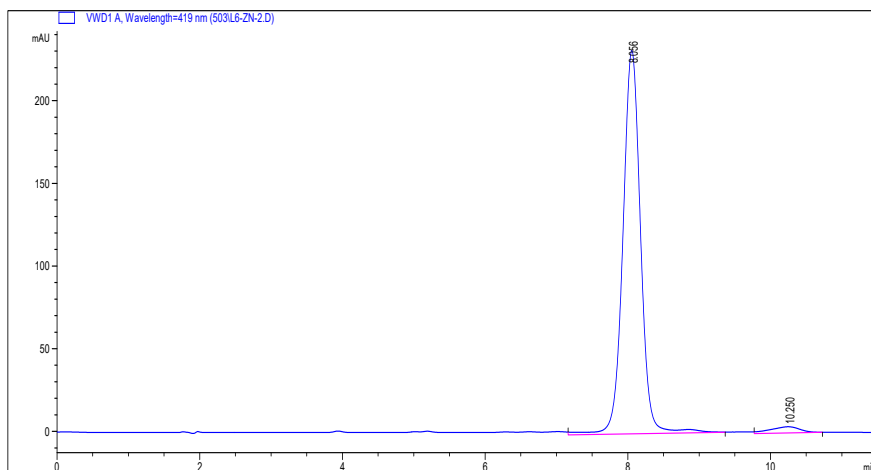

**Figure 3.10.** High-performance liquid chromatogram of compound **7e**

**Table 10.** High performance liquid chromatography data of compound **7e**

| Peak | Retention time (Min) | Peak area (mAU*s) | Peak area (%) |
|------|----------------------|-------------------|---------------|
| 1    | 8.056                | 4002.72437        | 97.3168       |
| 2    | 10.250               | 110.36194         | 2.6832        |

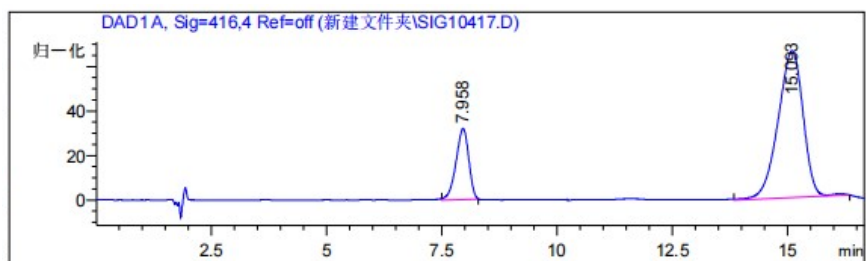

**Figure 3.11.** High-performance liquid chromatogram of compound **8a**

**Table 11.** High performance liquid chromatography data of compound **8a**

| Peak | Retention time (Min) | Peak area (mAU*s) | Peak area (%) |
|------|----------------------|-------------------|---------------|
| 1    | 7.958                | 406.17072         | 13.06578      |
| 2    | 15.093               | 2702.48926        | 86.93422      |

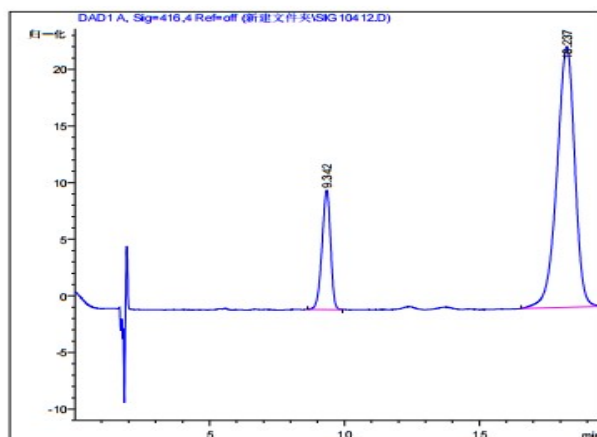

**Figure 3.12.** High-performance liquid chromatogram of compound **8b**

**Table 12.** High performance liquid chromatography data of compound **8b**

| Peak | Retention time (Min) | Peak area (mAU*s) | Peak area (%) |
|------|----------------------|-------------------|---------------|
| 1    | 9.342                | 232.07741         | 17.9426       |
| 2    | 18.237               | 1061.36877        | 82.0574       |

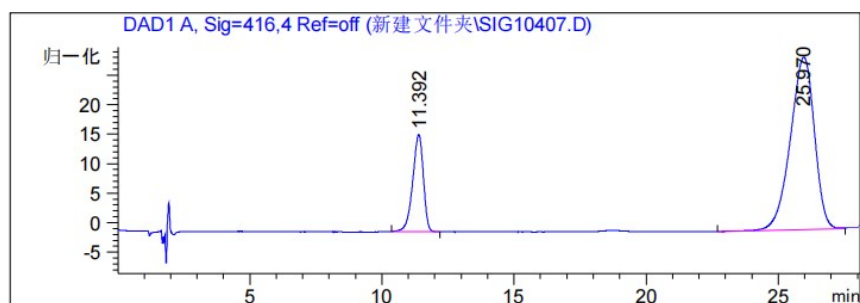

**Figure 3.13.** High-performance liquid chromatogram of compound **8c**

**Table 13.** High performance liquid chromatography data of compound **8c**

| Peak | Retention time (Min) | Peak area (mAU*s) | Peak area (%) |
|------|----------------------|-------------------|---------------|
| 1    | 11.392               | 362.39548         | 15.5781       |
| 2    | 25.970               | 1963.91809        | 84.4219       |

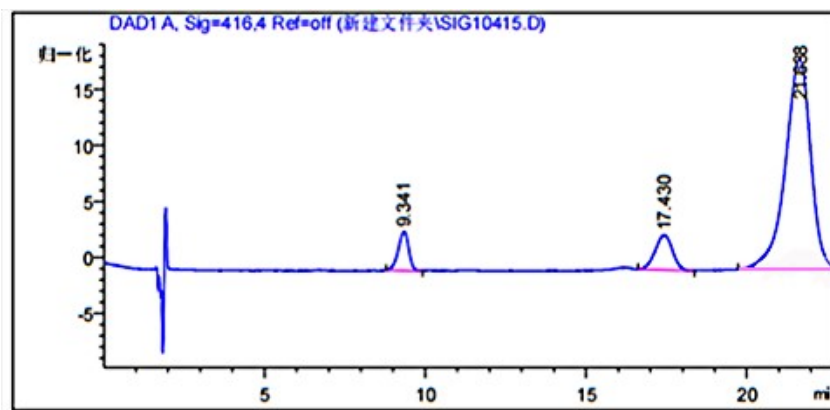

**Figure 3.14.** High-performance liquid chromatogram of compound **8d**

**Table 14.** High performance liquid chromatography data of compound **8d**

| Peak | Retention time (Min) | Peak area (mAU*s) | Peak area (%) |
|------|----------------------|-------------------|---------------|
| 1    | 9.341                | 57.10609          | 4.9686        |
| 2    | 17.430               | 105.72075         | 9.1986        |
| 3    | 21.638               | 986.48969         | 85.8327       |

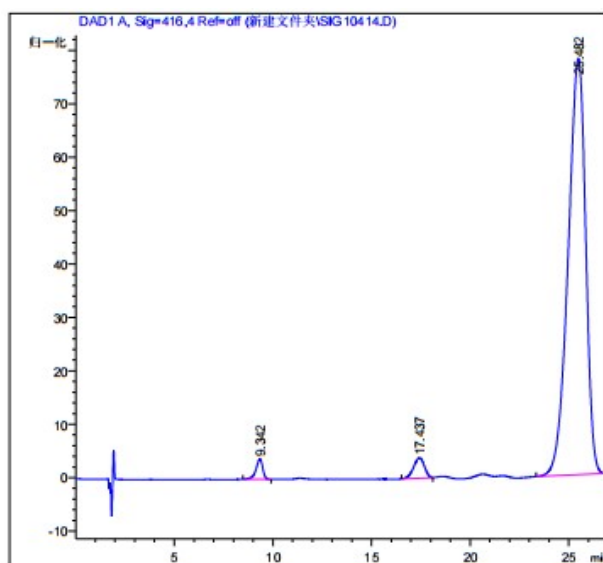

**Figure 3.15.** High-performance liquid chromatogram of compound **8e**

**Table 15.** High performance liquid chromatography data of compound **8e**

| Peak | Retention time (Min) | Peak area (mAU*s) | Peak area (%) |
|------|----------------------|-------------------|---------------|
| 1    | 9.342                | 90.35577          | 1.7963        |
| 2    | 17.437               | 144.80939         | 2.8789        |
| 3    | 25.482               | 4794.83984        | 95.3248       |
