# Supplementary material for: Design, synthesis and antitumor study of novel NO-type porphyrin–ferulic acid derivatives for chemotherapy and photodynamic therapy
Source: Royal Society of Chemistry journal article supplement (doi:10.1039/d4nj01134a), 2024-01-01
Supplement: d4nj01134a6.pdf [file d4nj01134a6.pdf]

## 2. Mass spectrum of NO-type porphyrin-ferulic acid derivatives

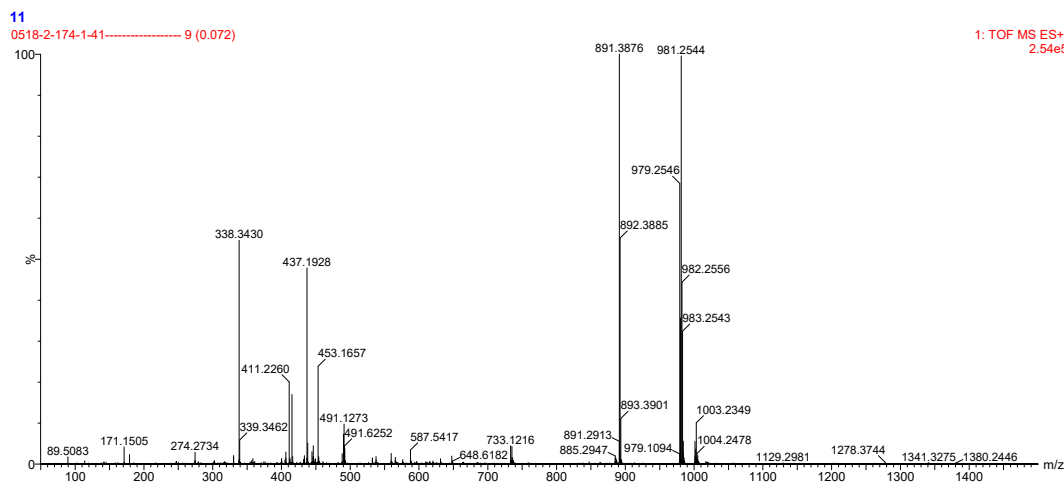

Figure S2.1. Mass spectrum of compound **6a**

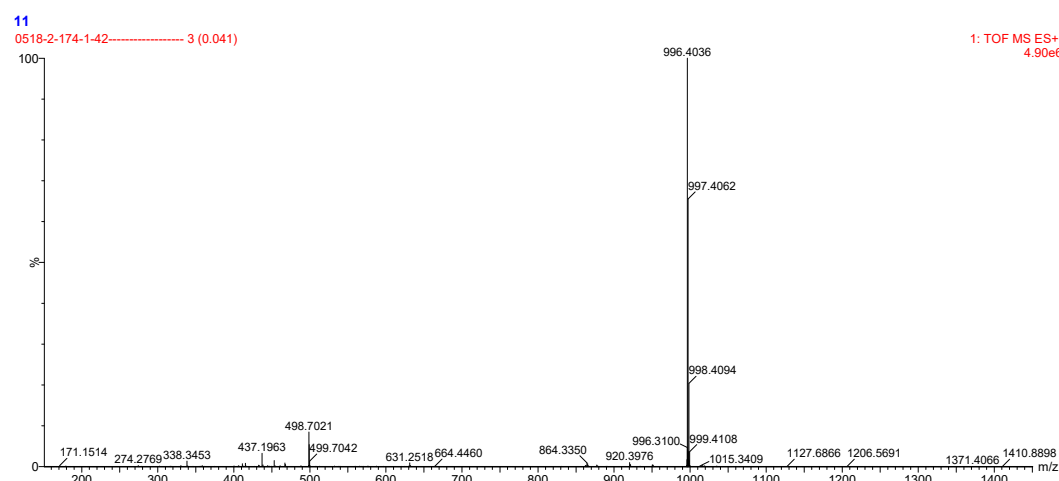

Figure S2.2. Mass spectrum of compound **6b**

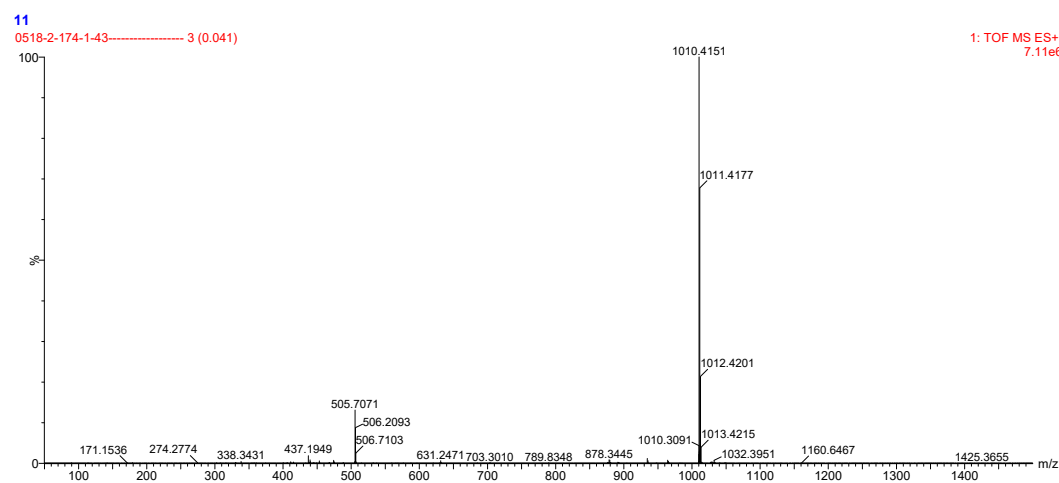

Figure S2.3. Mass spectrum of compound **6c**

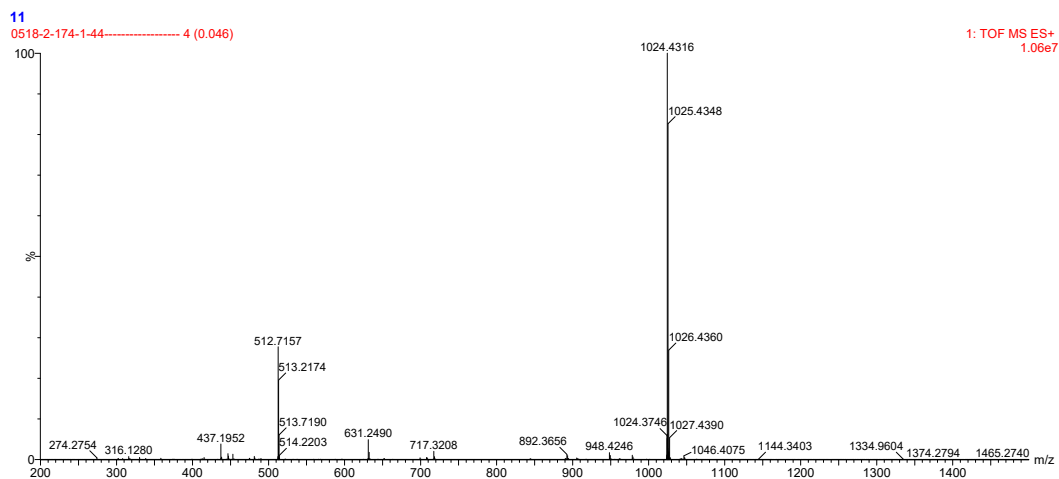

Figure S2.4. Mass spectrum of compound 6d

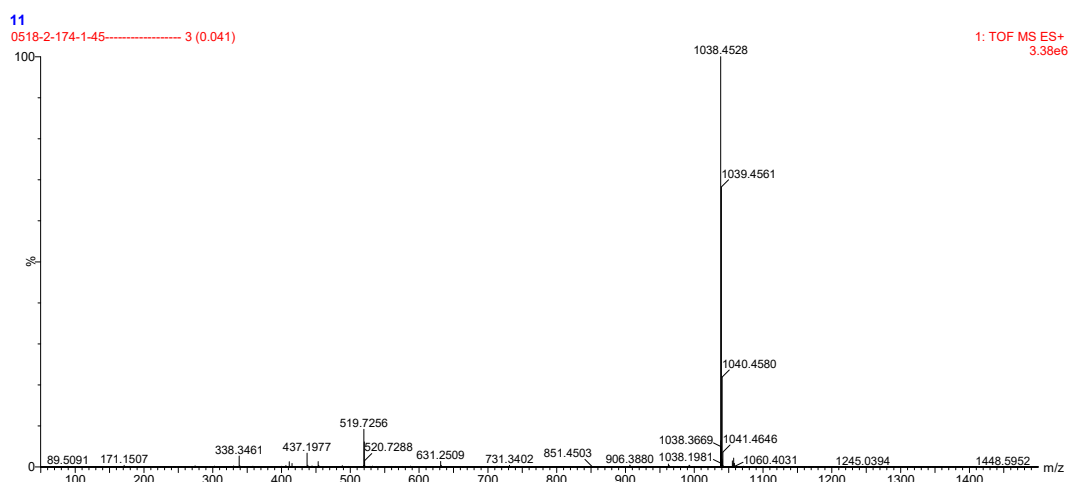

Figure S2.5. Mass spectrum of compound 6e

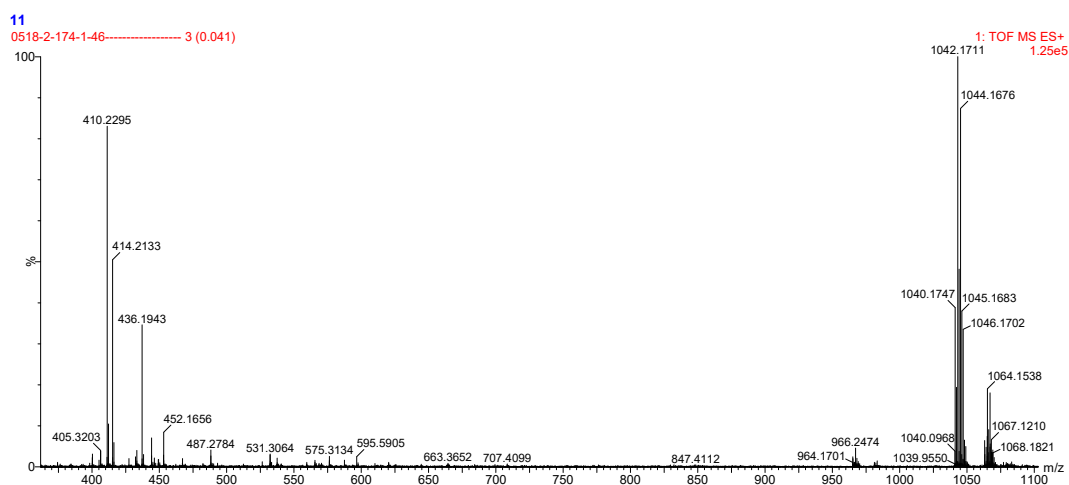

Figure S2.6. Mass spectrum of compound 7a

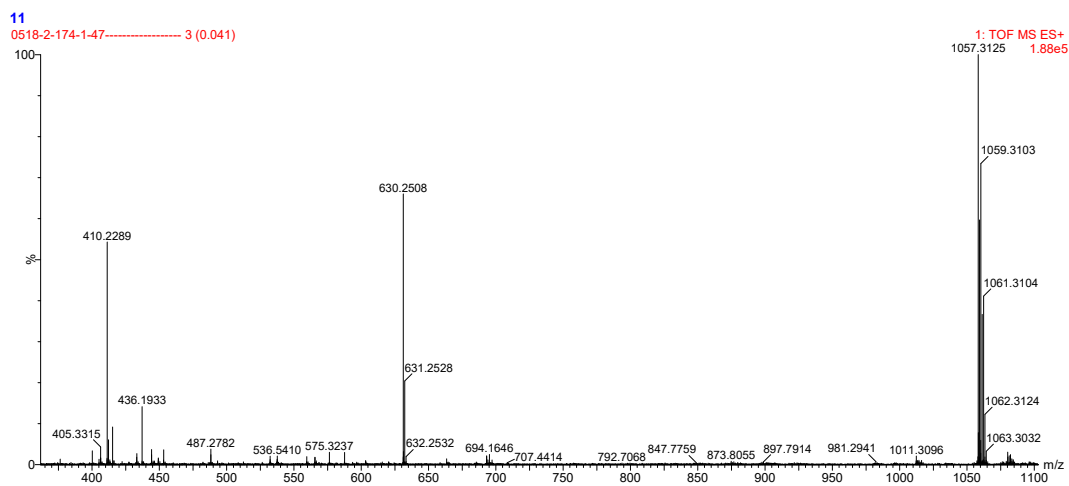

Figure S2.7. Mass spectrum of compound **7b**

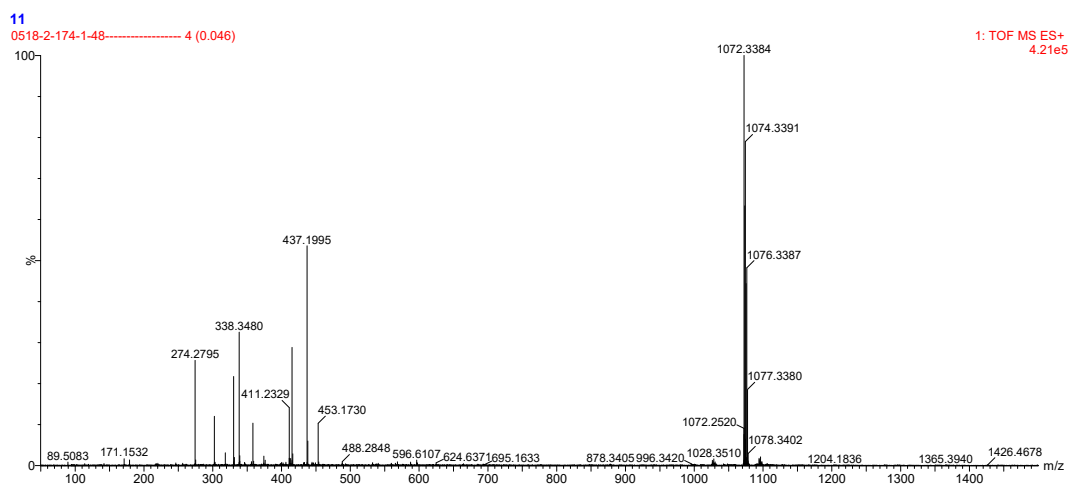

Figure S2.8. Mass spectrum of compound **7c**

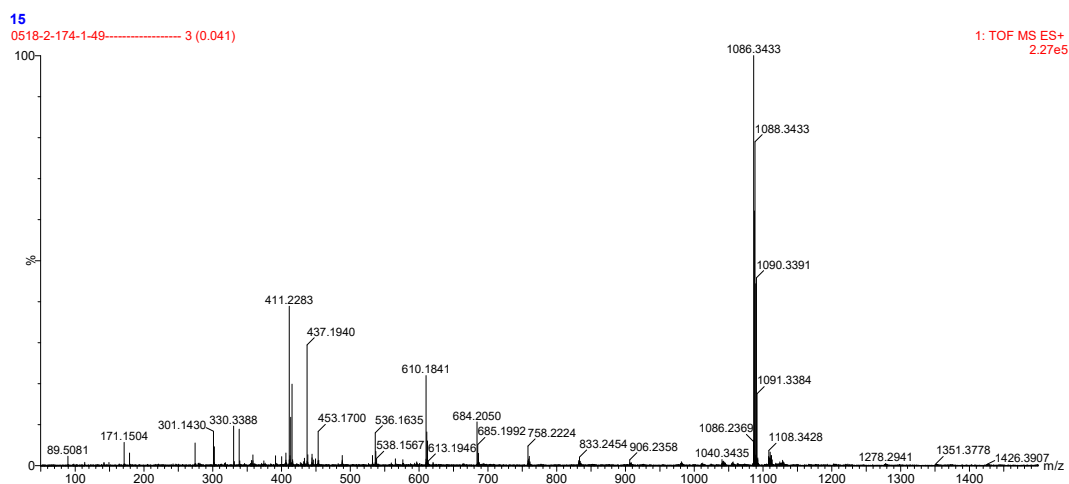

Figure S2.9. Mass spectrum of compound **7d**

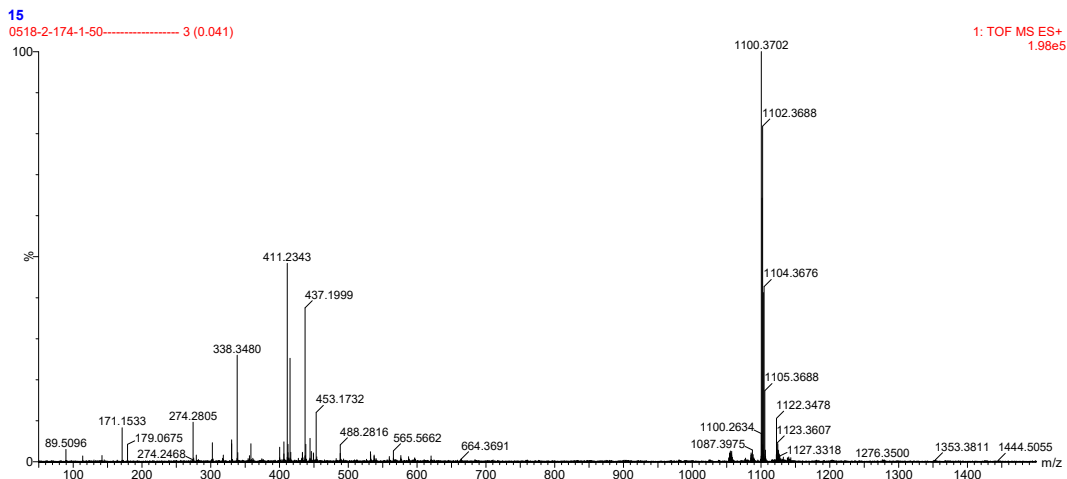

Figure S2.10. Mass spectrum of compound **7e**

8a(2) #17 RT: 0.16 AV: 1 NL: 6.25E6  
T: FTMS + p ESI Full ms [100.0000-1500.0000]

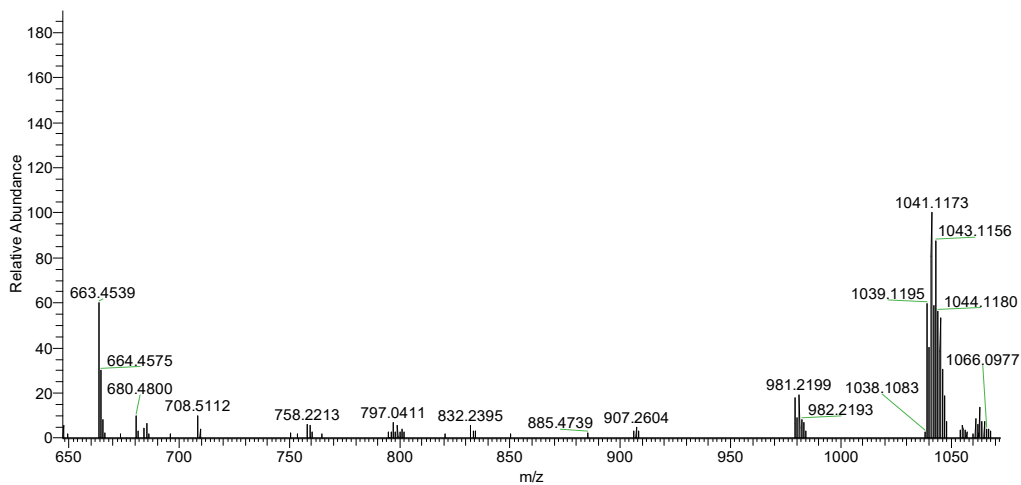

Figure S2.11. Mass spectrum of compound **8a**

8b(1) #19 RT: 0.18 AV: 1 NL: 3.49E6  
T: FTMS + p ESI Full ms [100.0000-1500.0000]

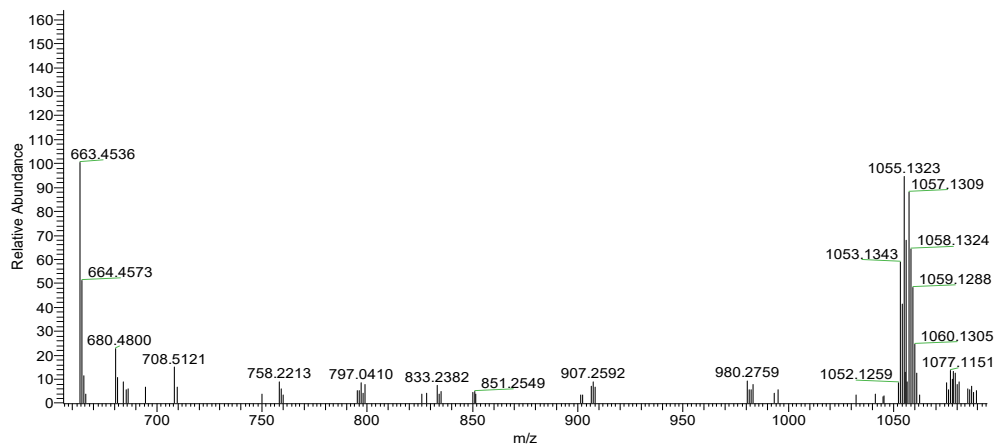

Figure S2.12. Mass spectrum of compound **8b**

8c #15 RT: 0.14 AV: 1 NL: 3.77E6  
T: FTMS + p ESI Full ms [100.0000-1500.0000]

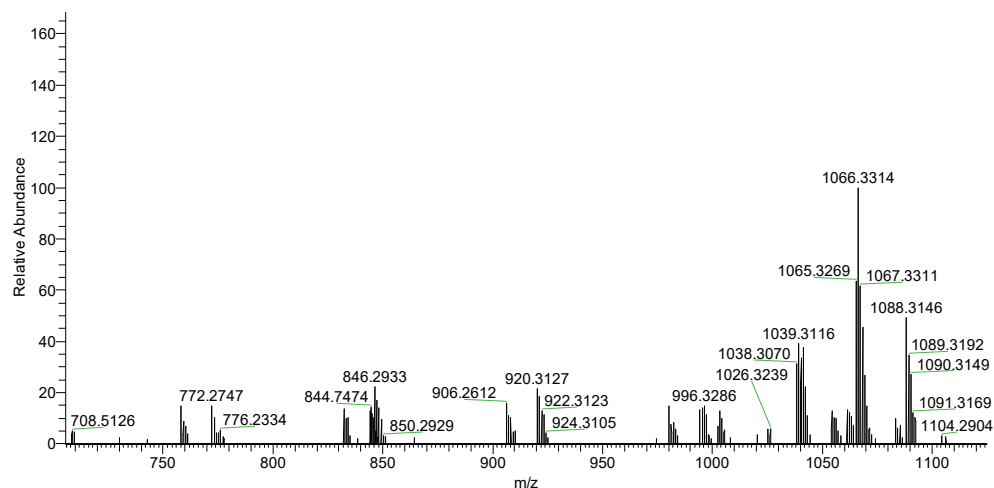

Figure S2.13.. Mass spectrum of compound 8c

8d #13 RT: 0.12 AV: 1 NL: 5.12E6  
T: FTMS + p ESI Full ms [100.0000-1500.0000]

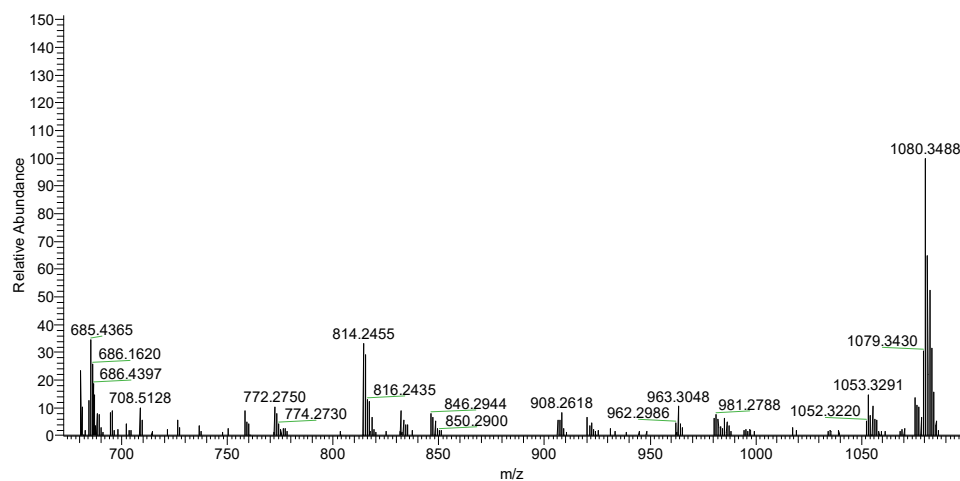

Figure S2.14. Mass spectrum of compound 8d

8e #15 RT: 0.14 AV: 1 NL: 5.21E6  
T: FTMS + p ESI Full ms [100.0000-1500.0000]

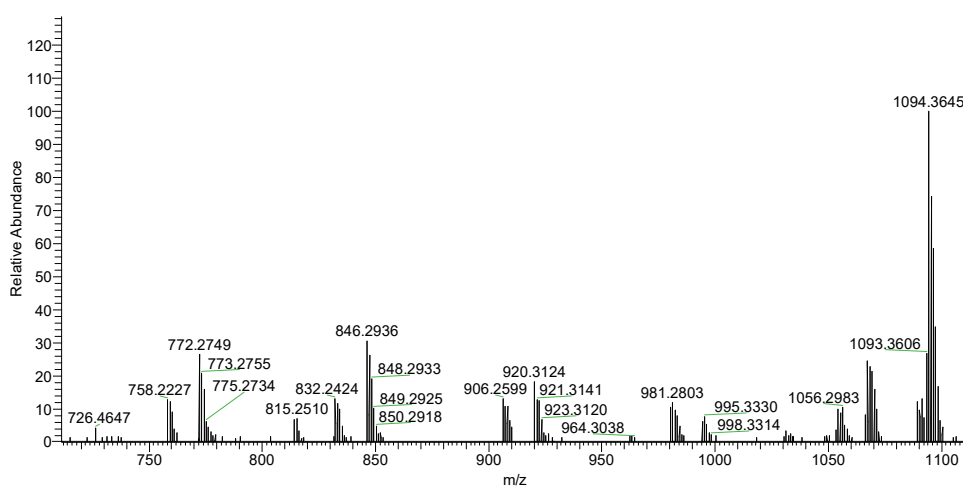

Figure S2.15. Mass spectrum of compound 8e
